# Supplementary material for: Norepinephrine Protects against Methamphetamine Toxicity through β2-Adrenergic Receptors Promoting LC3 Compartmentalization
Source: MDPI journal article supplement (doi:10.3390/ijms22137232), 2021-07-05
Supplement: s1 [file s1]

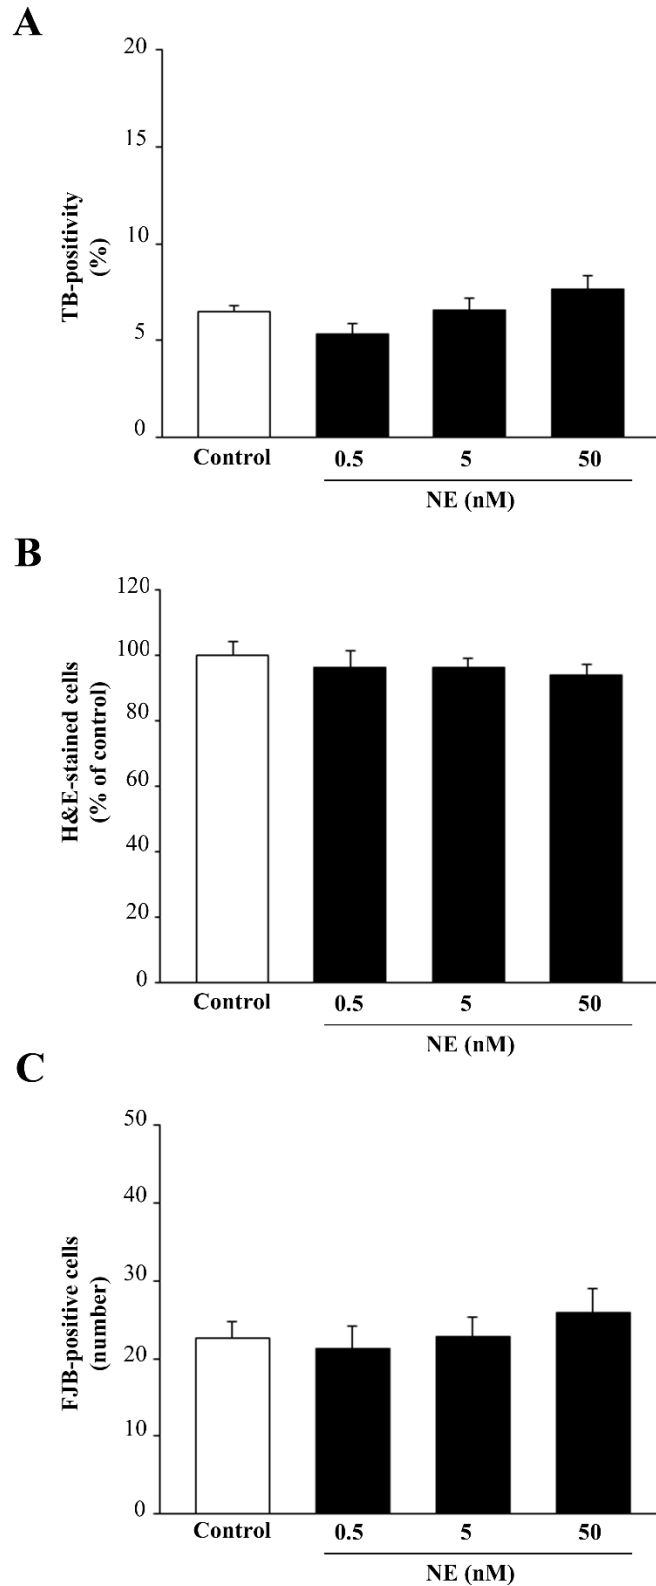

**Supplementary Figure S1. Lack of toxicity in a low dose-response curve for NE.** Three doses of NE (0.5 nM, 5 nM, 50 nM) were administered for 72 hours to PC12 cells. The effects on cell viability were assessed by TB staining (**A**); H&E staining (**B**); FJB histofluorescence (**C**). Any change in cell viability compared with controls was detected for each dose of NE by using any staining technique. Data are given as the mean+SEM of 9 independent counts for TB; 6 independent counts for H&E and FJB. Inferential statistics was carried out with ANOVA with Scheffé's post-hoc analysis (DF=3).

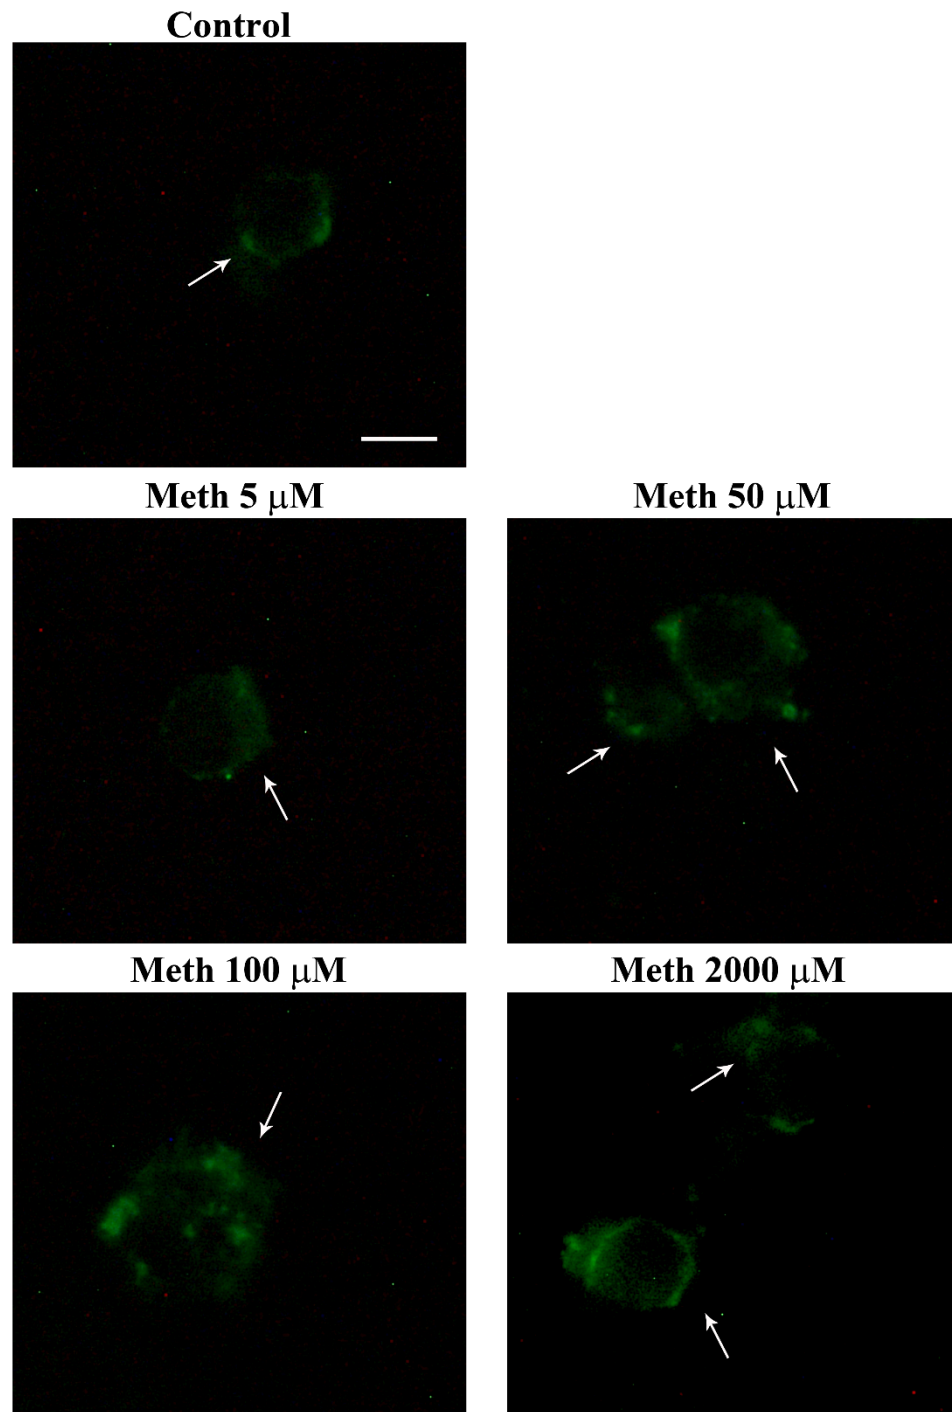

**Supplementary Figure S2. Meth does not increase caspase 3-immunofluorescence.** (A) Representative pictures of caspase 3-immunofluorescent cells observed after exposure to increasing doses of Meth (from 5  $\mu$ M up to 2000  $\mu$ M). Arrows indicate the caspase-3-immunofluorescent cells. Scale bar = 6  $\mu$ m.

**A**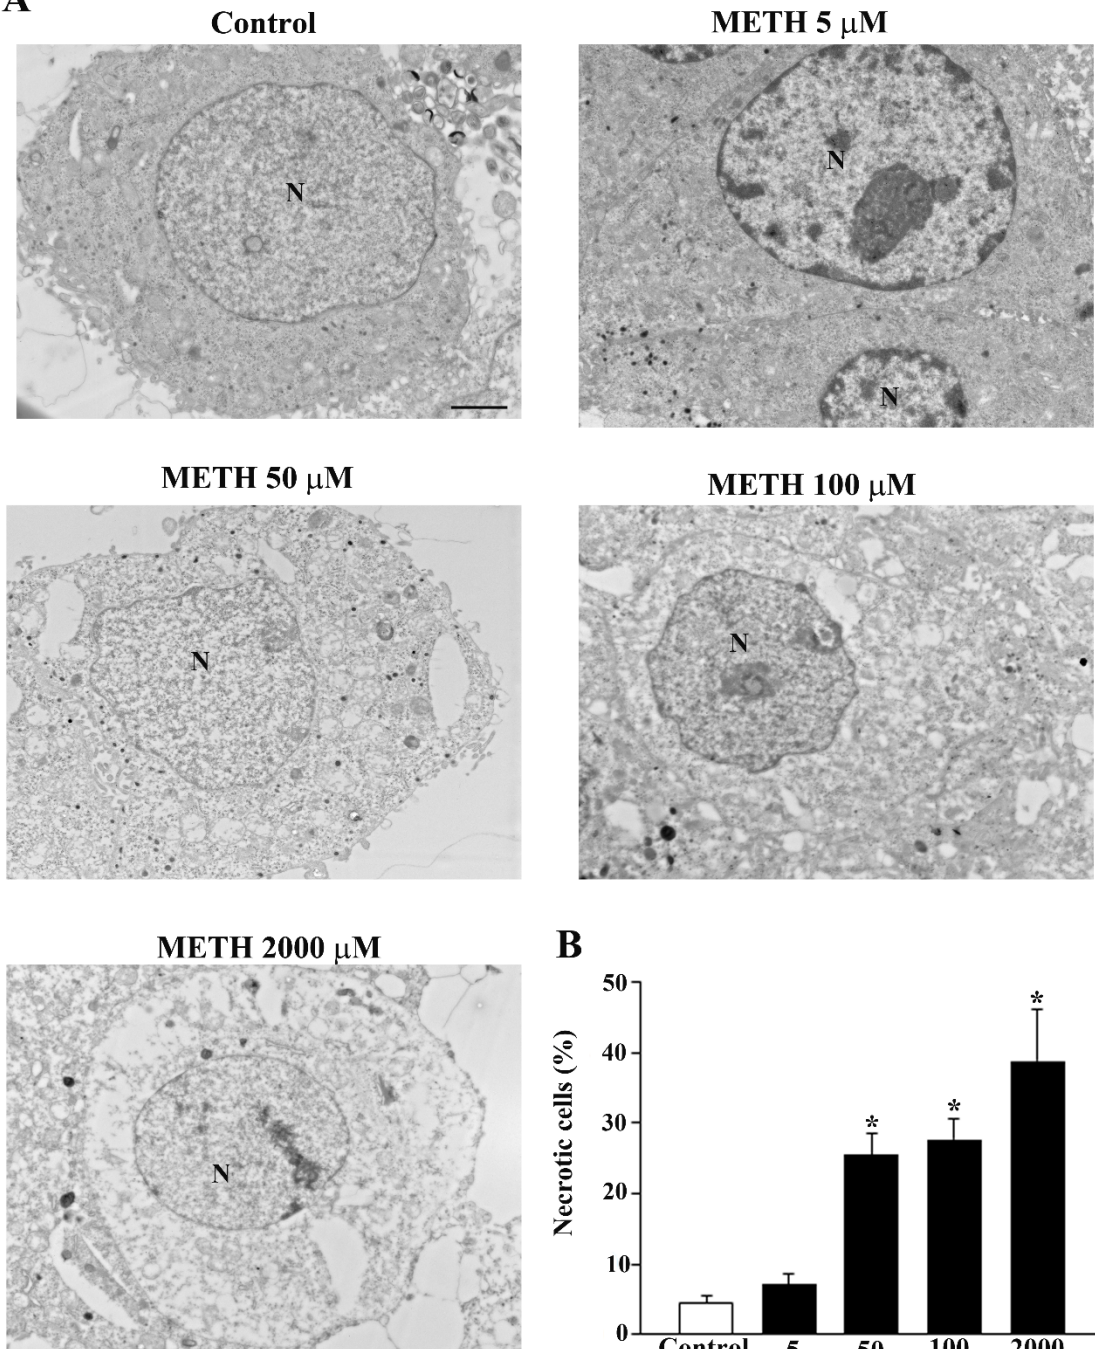

**Supplementary Figure S3. Meth induces necrotic cell death.** (A) Representative micrographs of PC12 cells after increasing doses of Meth (from 5  $\mu$ M up to 2000  $\mu$ M). (DF=4). Scale bar = 1  $\mu$ m.

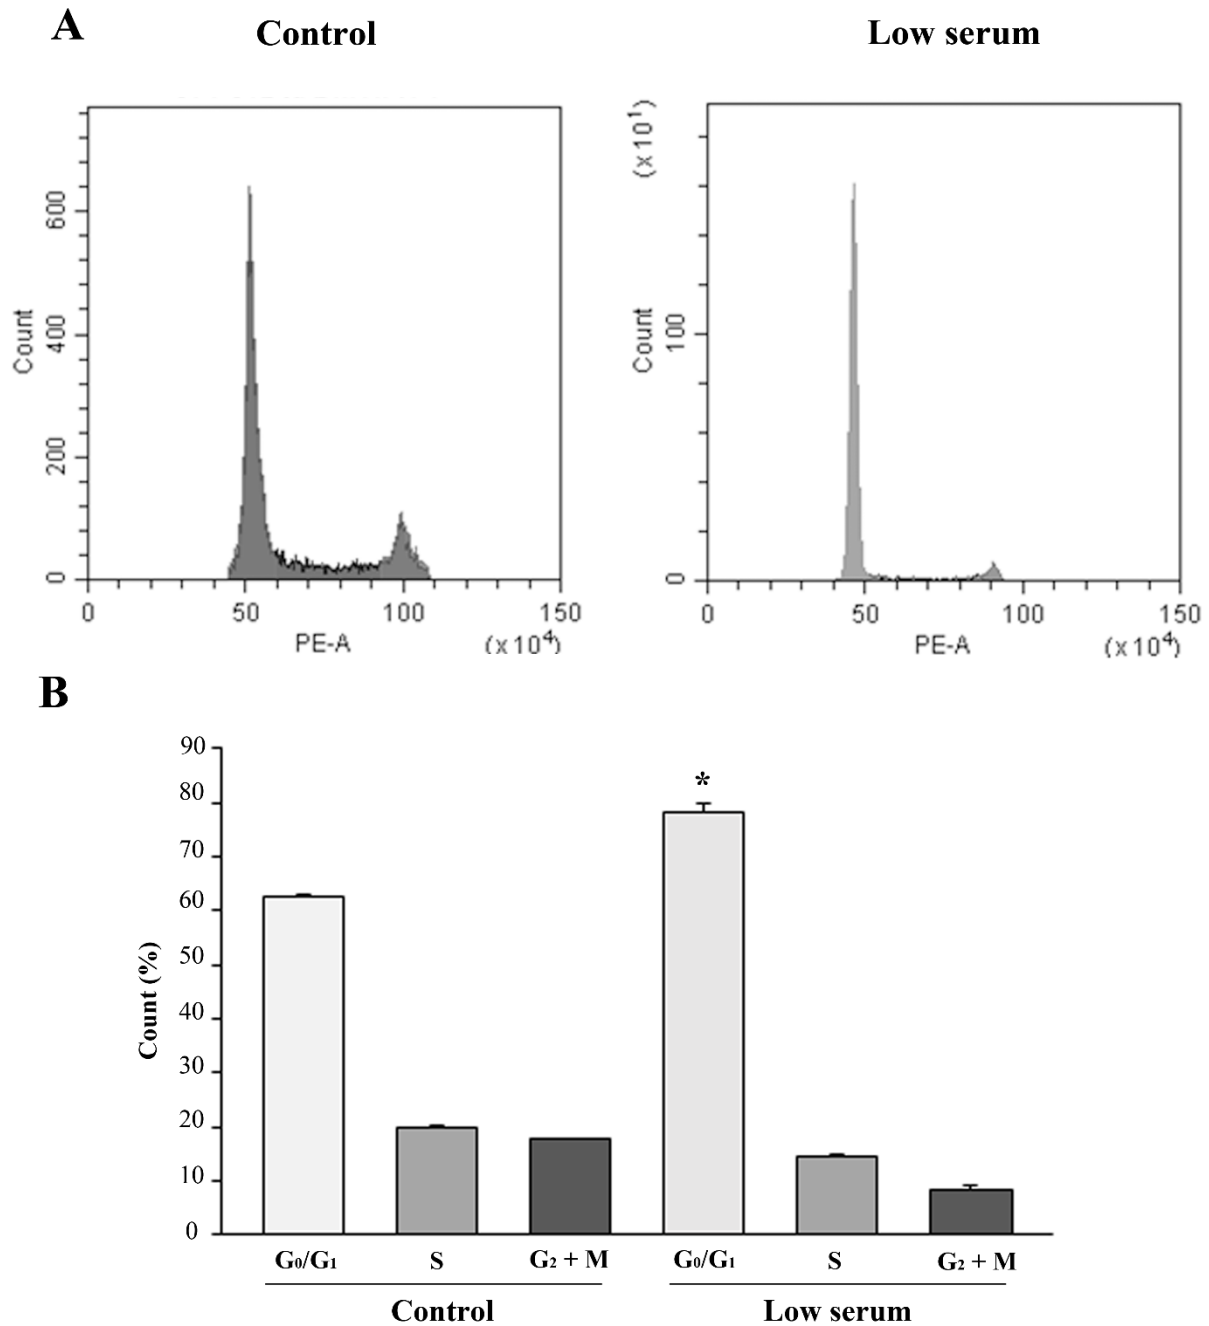

**Supplementary Figure S4. Cell cycle analysis of PC12 cells under standard or low serum culture conditions (starvation).** Starvation synchronizes PC12 cells by significantly increasing the percentage of cells in the G<sub>0</sub>/G<sub>1</sub> phase of the cell cycle. (DF=5) \*P<0.05 compared with all other groups.

**A**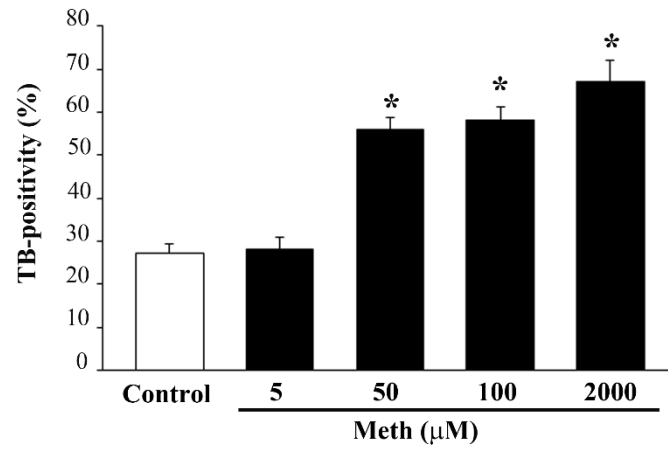**B**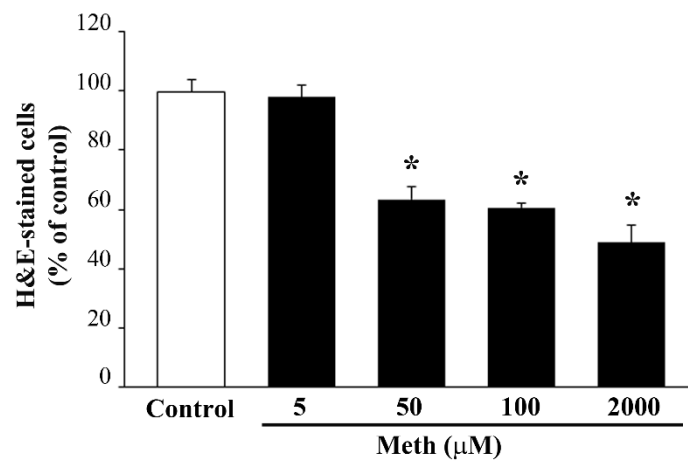**C**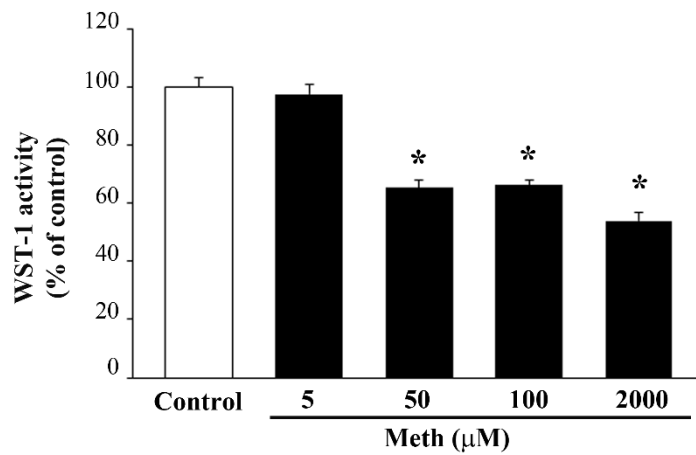

**Supplementary Figure S5. The dose response curve for Meth-induced toxicity is not modified in synchronized PC12 cells.** Cell viability of PC12 cells treated with increasing doses of Meth (from 5 μM up to 2000 μM) is assessed by (A) TB, (B) H&E, (C) WST-1 assay. (DF=4). \*P<0.05 compared with control.

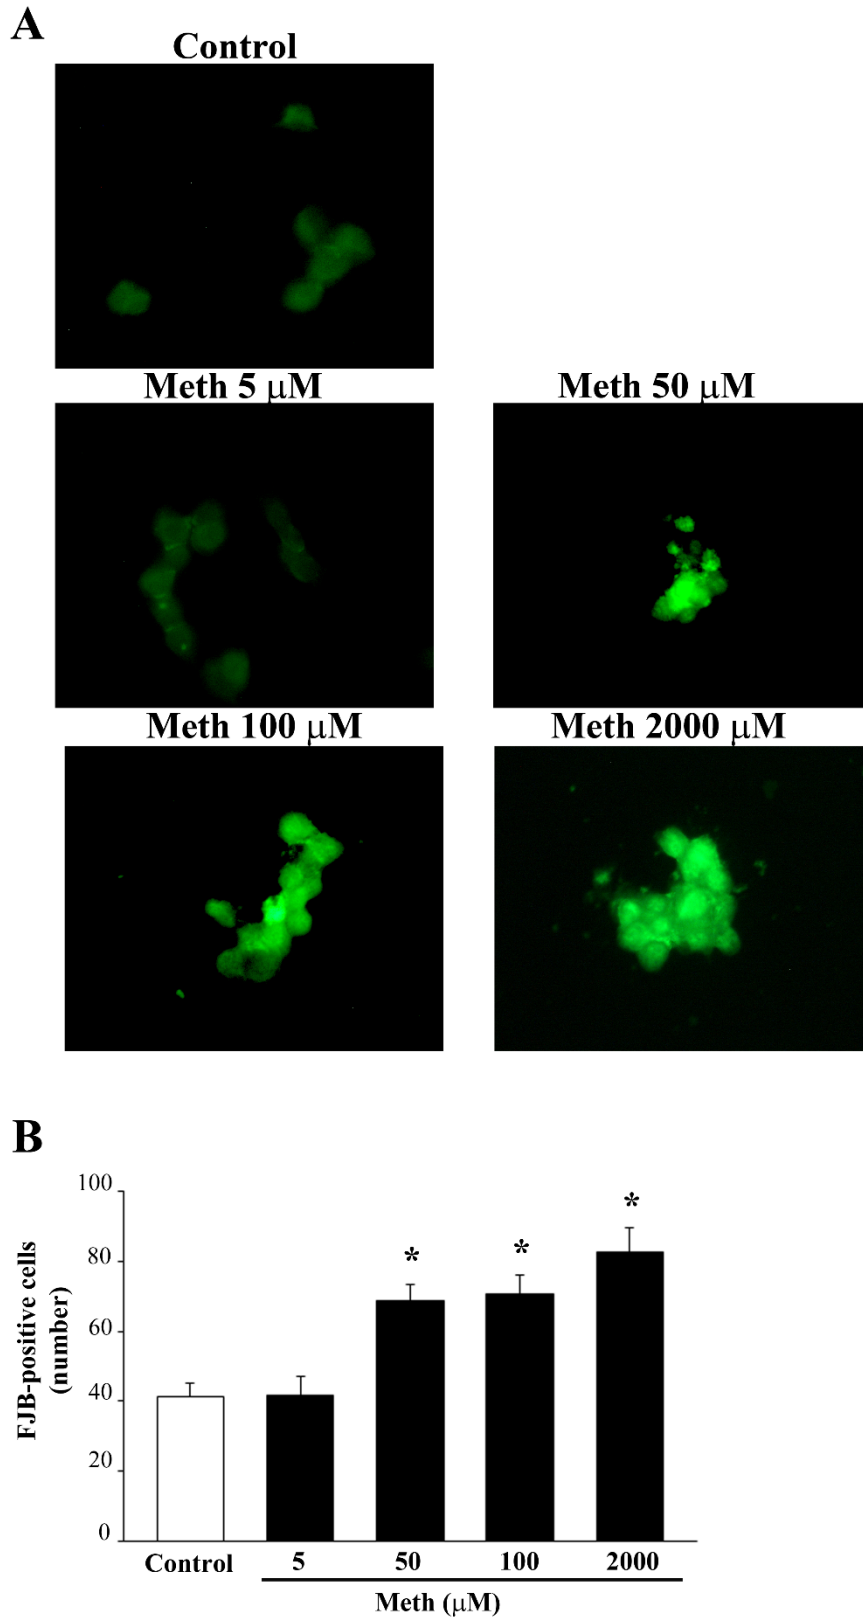

**Supplementary Figure S6. FJB fluorescence in synchronized PC12 cells after increasing doses of Meth.** (A) Representative pictures of FJB-fluorescent cells observed after exposure to increasing doses of Meth (from 5  $\mu$ M up to 2000  $\mu$ M). The related number of FJB-fluorescent cells is reported in the graph (B). (DF=4) \*P<0.05 compared with control.

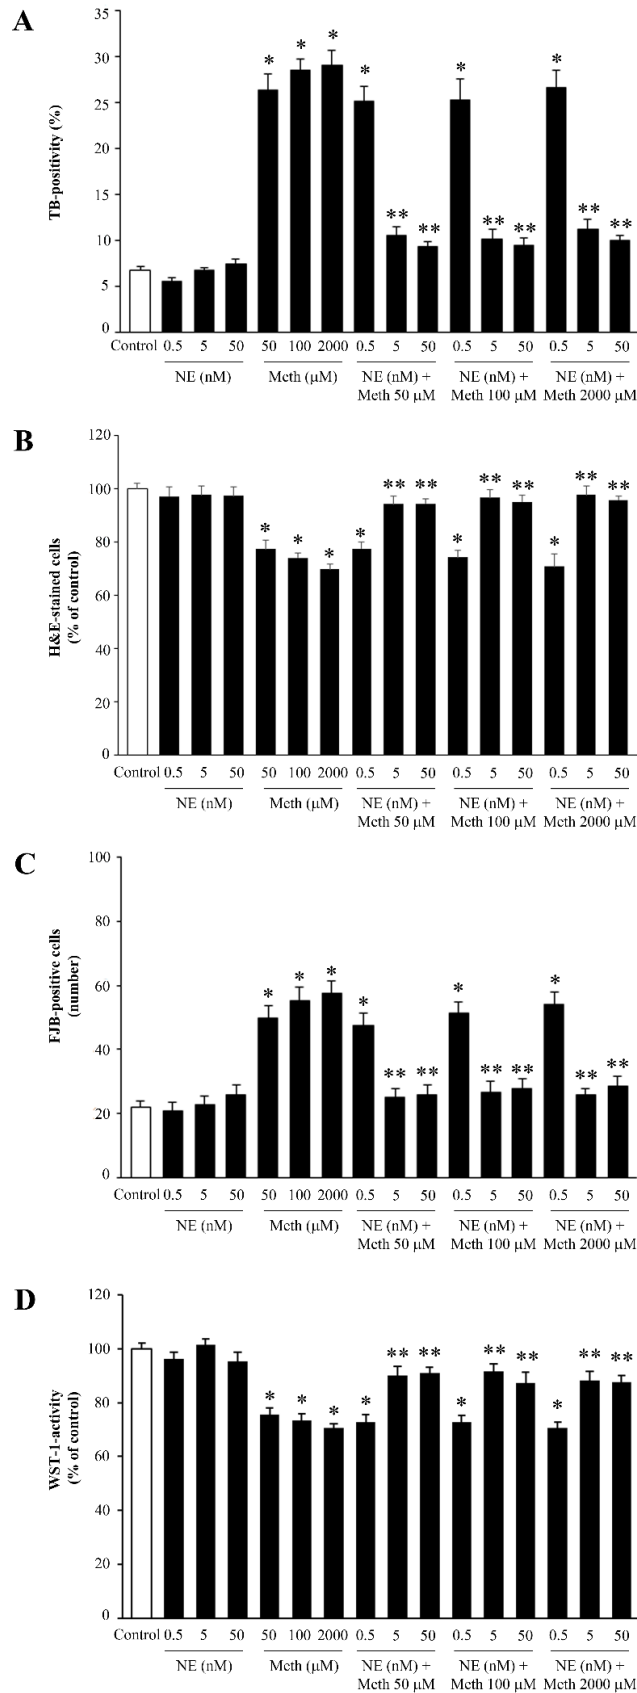

**Supplementary Figure S7. Dose-response of NE-induced protection against Meth-induced toxicity.** Three different concentrations of NE (0.5 nM, 5 nM, 50 nM) were administered 30 min before saline (Controls) or various toxic doses of Meth (50 μM, 100 μM, 1 mM, 2 mM). Norepinephrine at the lowest dose (50 μM) fully protects against Meth toxicity even for the high Meth dose (2 mM). (A) Graph for TB-stained cells; (B) graph of H&E-stained cells; (C) graph of FJB-stained cells; (D) graph of WST-1 viability assay. Data are given as the mean+SEM of 9 independent counts for TB and WST-1; 6

independent counts for H&E and FJB. Inferential statistics was carried out with ANOVA with Scheffé's post-hoc analysis. (DF=15) \*P<0.05 compared with controls. \*\*P≤ 0.05 compared with Meth.



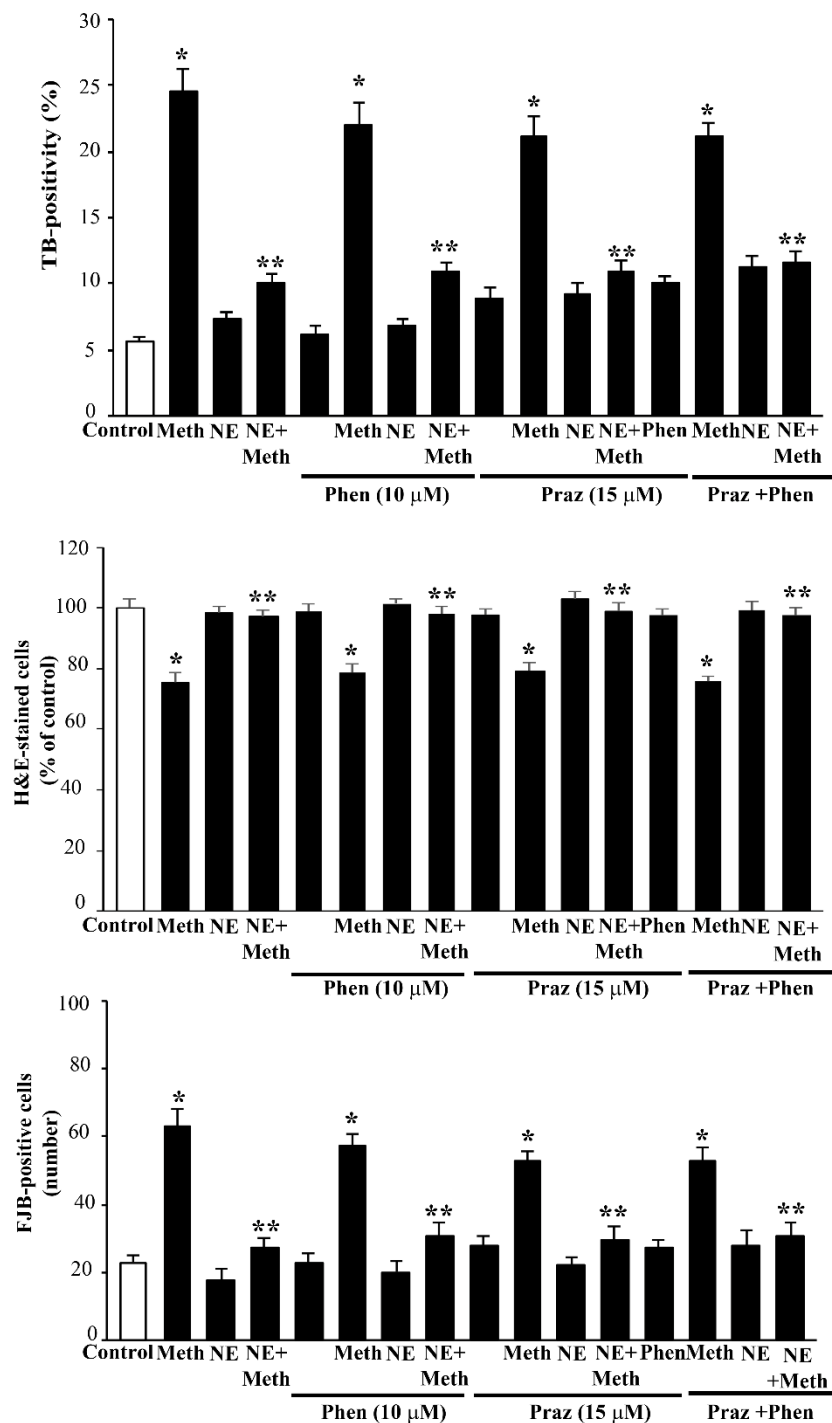

**Supplementary Figure S8. Pre-administration of neither the  $\alpha$ 1-AR agonist (phenylephrine) nor the  $\alpha$ 1-AR antagonist (prazosin) alters Meth toxicity.** The  $\alpha$ 1-AR agonist phenylephrine ("Phen", 10  $\mu$ M) and the  $\alpha$ 1-AR antagonist prazosin ("Praz", 15  $\mu$ M) do not alter Meth (50  $\mu$ M) toxicity. In the combined treatment groups, NE (5 nM) and/or phenylephrine were administered 30 min before Meth administration; prazosin was administered 15 min before NE in the group "NE+Praz+Meth", or 45 min before Meth in the group "Praz+Meth". Phenylephrine was administered 30 min before Meth in the group "Phen+Meth" and "Phen+NE+Meth". PC12 cells were stained at 72 hours after Meth. (A) Graph reporting TB staining; (B) graph reporting H&E staining (C) graph reporting FJB staining. Data are given as the mean+SEM of 9 independent counts for TB; 6 independent counts for H&E and FJB. Inferential statistics was carried out with ANOVA with Scheffé's post-hoc analysis. (DF=15) \* $P$ <0.05 compared with controls. \*\* $P$ ≤ 0.05 compared with Meth.

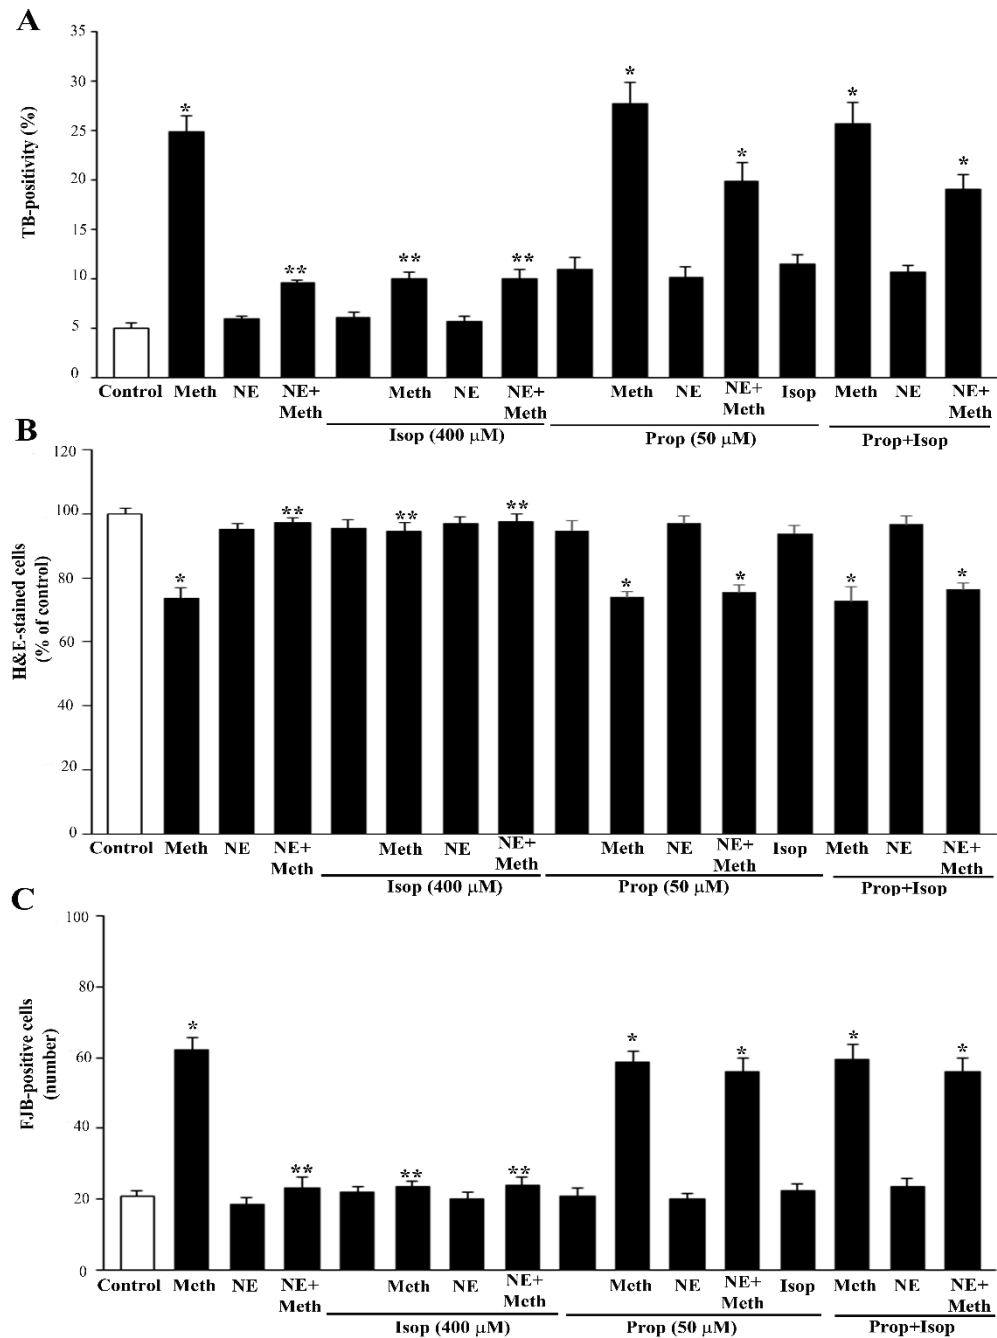

**Supplementary Figure S9. Pre-administration of the  $\alpha$ -AR agonist (isoproterenol) protects against Meth toxicity.** This effect is occluded by the  $\beta$ 1-AR antagonist (propranolol). The non-selective  $\beta$ -AR agonist isoproterenol ("Isop", 400  $\mu$ M) fully protects against the toxicity induced by Meth (50  $\mu$ M). This protective effect is occluded in the presence of the non-selective  $\beta$ -AR antagonist propranolol ("Prop", 50  $\mu$ M). Propranolol also fully antagonize NE (5 nM) induced protection against Meth toxicity, while it does not significantly modify Meth toxicity or spontaneous toxicity ongoing in control cells when administered alone. In the combined treatments NE and isoproterenol were administered 30 min before Meth administration; propranolol was administered 15 min before NE in the group "NE+Prop+Meth", or 45 min before Meth in the group "Prop+Meth". PC12 cells were stained at 72 hours after Meth. (A) Graph reporting TB staining; (B) graph reporting H&E staining; (C) graph reporting FJB staining. Data are given as the mean+SEM of 9 independent counts for TB; 6 independent counts for H&E and FJB. Inferential statistics was carried out with ANOVA with Scheffé's post-hoc analysis. (DF=15). \* $P < 0.05$  compared with controls. \*\* $P \leq 0.05$  compared with Meth.

**A**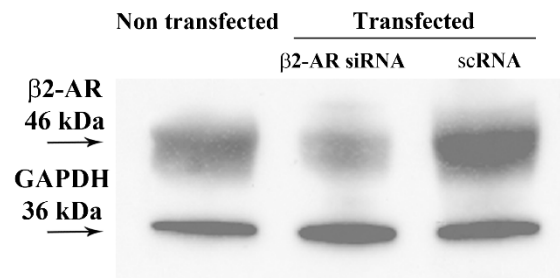**B**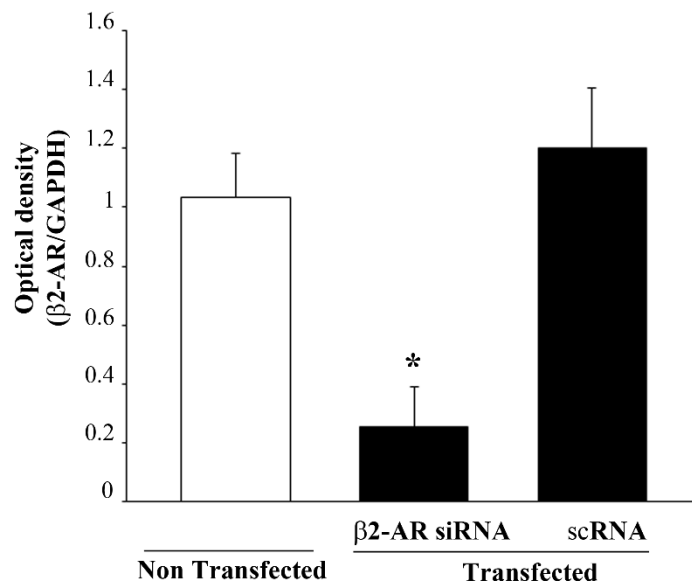

**Supplementary Figure S10. Transfection with  $\beta 2$ -AR siRNA silences the expression of  $\beta 2$ -AR in PC12 cells. (A) Western blot for  $\beta 2$ -AR in transfected and non transfected cells. (B) Optical density shows that the expression of  $\beta 2$ -AR is reduced over than 75% within cells transfected with  $\beta 2$ -AR siRNA. . \*P<0.05 compared with control and scRNA transfected cells. (DF=2).**

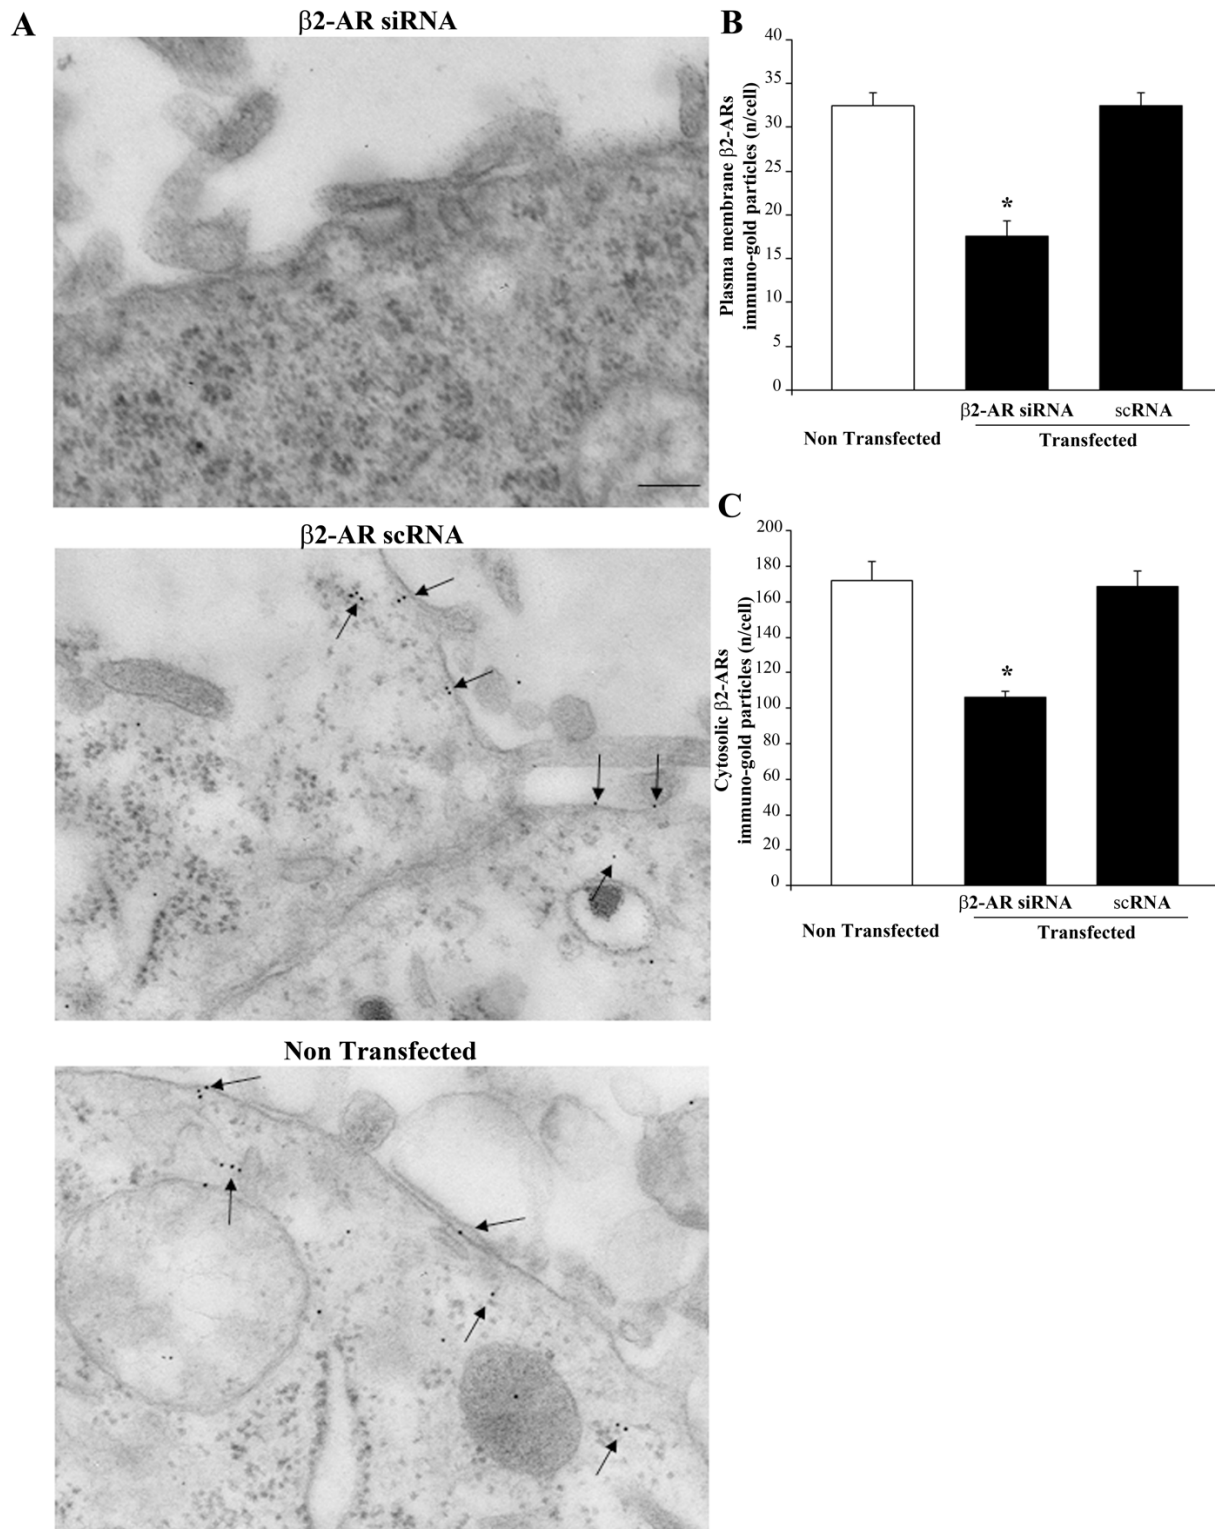

**Supplementary Figure S11. Transfection with  $\beta 2$ -AR siRNA removes  $\beta 2$ -AR from the plasma membrane (A)** Representative TEM micrographs show the lack of  $\beta 2$ -AR on plasma membrane of  $\beta 2$ -AR siRNA transfected cells. The graphs report the number of  $\beta 2$ -AR-related immune-gold particles per cell which were counted on the plasma membrane (**B**) and within the cytosol (**C**) of transfected and non-transfected cells. Arrows indicate anti- $\beta 2$ -AR immunogold particles adherent to the plasma membrane and into the cytosol.\* $P < 0.05$  compared with control and  $\beta 2$ -AR scRNA transfected cells. (DF=2) Scale bar = 100 nm.
